# Supplementary material
Source: MDPI journal article supplement (https://www.mdpi.com/2077-0383/10/11/2420)
Supplement: s1 [file s1]

Archive with 2 entries (2 files):
- S1_studyprotocol_.pdf
- Supp S2 to S9.pdf
