# Supplementary material for: Tolerability and Efficacy of s.c. IgG Self-Treatment in ME/CFS Patients with IgG/IgG Subclass Deficiency: A Proof-of-Concept Study
Source: MDPI journal article supplement (doi:10.3390/jcm10112420), 2021-05-29
Supplement: s1 [file s1]

**Supplementary Data S2 to S9**

**Tolerability and Efficacy of s.c. IgG Self-Treatment in  
ME/CFS Patients with IgG/IgG Subclass Deficiency: A  
Proof-of-Concept Study**

Carmen Scheibenbogen<sup>\*1,2</sup>, Franziska Sotzny<sup>1</sup>, Jelka Hartwig<sup>1</sup>, Sandra Bauer<sup>1</sup>, Helma Freitag<sup>1</sup>, Kirsten Wittke<sup>1</sup>, Wolfram Doehner<sup>2,3</sup>, Nadja Scherbakov<sup>2,3</sup>, Madlen Loebel<sup>4</sup>, Patricia Grabowski<sup>1</sup>

**Journal of Clinical Medicine, 2021**

**\* Corresponding author:**

**Carmen Scheibenbogen**

Institute of Medical Immunology, Charité – Universitätsmedizin Berlin, corporate member of Freie Universität Berlin and Humboldt-Universität zu Berlin, Germany

Carmen.Scheibenbogen@charite.de

**Table S2:** Patient characteristics and treatment response

| Pat. | sex/<br>age<br>[years] | age [years]<br>at disease<br>onset | Bell | infection<br>triggered<br>onset | IgG<br>deficiency | treatment<br>prematurely<br>ceased | responder<br>month 12 | response<br>at month<br>6 or 9 |
|------|------------------------|------------------------------------|------|---------------------------------|-------------------|------------------------------------|-----------------------|--------------------------------|
| 1    | m/44                   | 30                                 | 50   | no                              | IgG               | 2 injections                       |                       |                                |
| 2    | m/33                   | 17                                 | 40   | EBV                             | IgG4              |                                    | yes                   |                                |
| 3    | f/54                   | 45                                 | 25   | no                              | IgG3              | month 6                            |                       |                                |
| 4    | f/39                   | 36                                 | 40   | respiratory<br>tract infection  | IgG/IgG1          |                                    |                       | yes                            |
| 5    | m/37                   | 28                                 | 20   | EBV                             | IgG2              |                                    |                       |                                |
| 6    | m/60                   | 55                                 | 30   | no                              | IgG3              |                                    |                       |                                |
| 7    | f/32                   | 31                                 | 30   | respiratory<br>tract infection  | IgG3              |                                    |                       |                                |
| 8    | f/70                   | 42                                 | 30   | herpes zoster                   | IgG               |                                    |                       | yes                            |
| 9    | m/46                   | 43                                 | 30   | borreliosis                     | IgG3              |                                    | yes                   |                                |
| 10   | f/62                   | 61                                 | 40   | peri-<br>myocarditis            | IgG               |                                    |                       |                                |
| 11   | f/49                   | 47                                 | 20   | EBV                             | IgG3              |                                    | yes                   |                                |
| 12   | m/18                   | 15                                 | 20   | no                              | IgG4              | month 3                            |                       |                                |
| 13   | f/38                   | 36                                 | 20   | respiratory<br>tract infection  | IgG3              |                                    | yes                   |                                |
| 14   | m/29                   | 28                                 | 40   | bronchitis                      | IgG4              | 1 injection                        |                       |                                |
| 15   | f/54                   | 51                                 | 45   | respiratory<br>tract infection  | IgG3/IgG4         | month 3                            |                       |                                |
| 16   | f/46                   | 36                                 | 20   | mycoplasma<br>pneumonia         | IgG4              |                                    | yes                   |                                |
| 17   | m/54                   | 42                                 | 30   | no                              | IgG               |                                    |                       |                                |

[EBV= Epstein–Barr virus; f=female; m=male]

**Table S3:** Adverse events

| adverse event                           | treatment completed<br>(n=12)                 | treatment not completed<br>(n=5)<br>(P1, P3, P12, P14, P15) |
|-----------------------------------------|-----------------------------------------------|-------------------------------------------------------------|
| injection site<br>reaction              | grade 1: n=10<br>grade 2: n=2 (P13, P11)      | grade 1: n=3<br>grade 2: n=2 (P3, P14)                      |
| flu-like symptoms                       | grade 1: n=11<br>grade 2: n=1 (P4)            | grade 1: n=2<br>grade 2: n=1 (P3)                           |
| headache                                | grade 1: n=2<br>grade 2: n=3 (P4, P7,<br>P10) | grade 1: n= 3<br>grade 2: n=1 (P3)<br>grade 3: n=1 (P1)     |
| abdominal pain                          | grade 2: n=1 (P4)                             | grade 1: n=3<br>grade 2: n=1 (P3)                           |
| diarrhea                                | grade 1: n=2                                  | grade 1: n=2                                                |
| liver toxicity<br>(ALT/GPT<br>increase) | grade 1: n=3                                  | grade 3 n=1 (P15)                                           |

Grade refers to the severity of the adverse event, as described in the “Common Terminology Criteria for Adverse Events (CTCAE)” Version 5. (grade 1: mild, grade 2: moderate, grade 3: severe)

**S4**

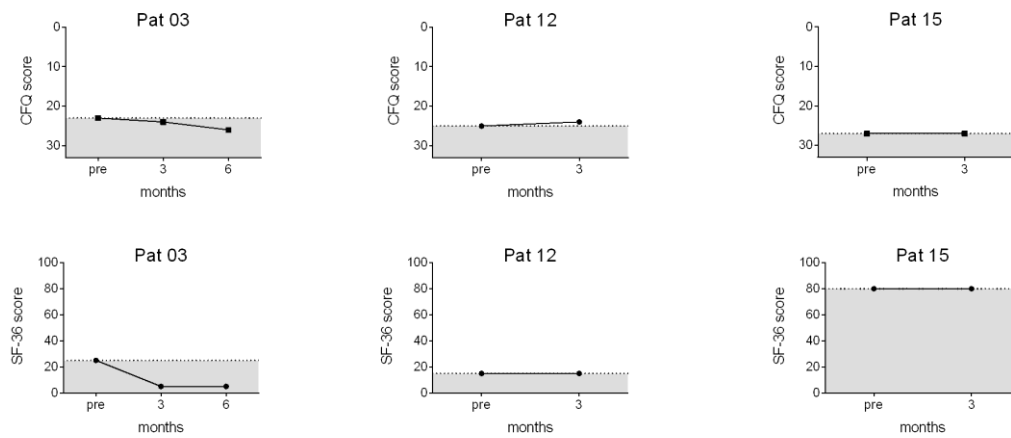

**Figure S4:** CFQ and the SF-36 data of patients 3 and 6.

S5

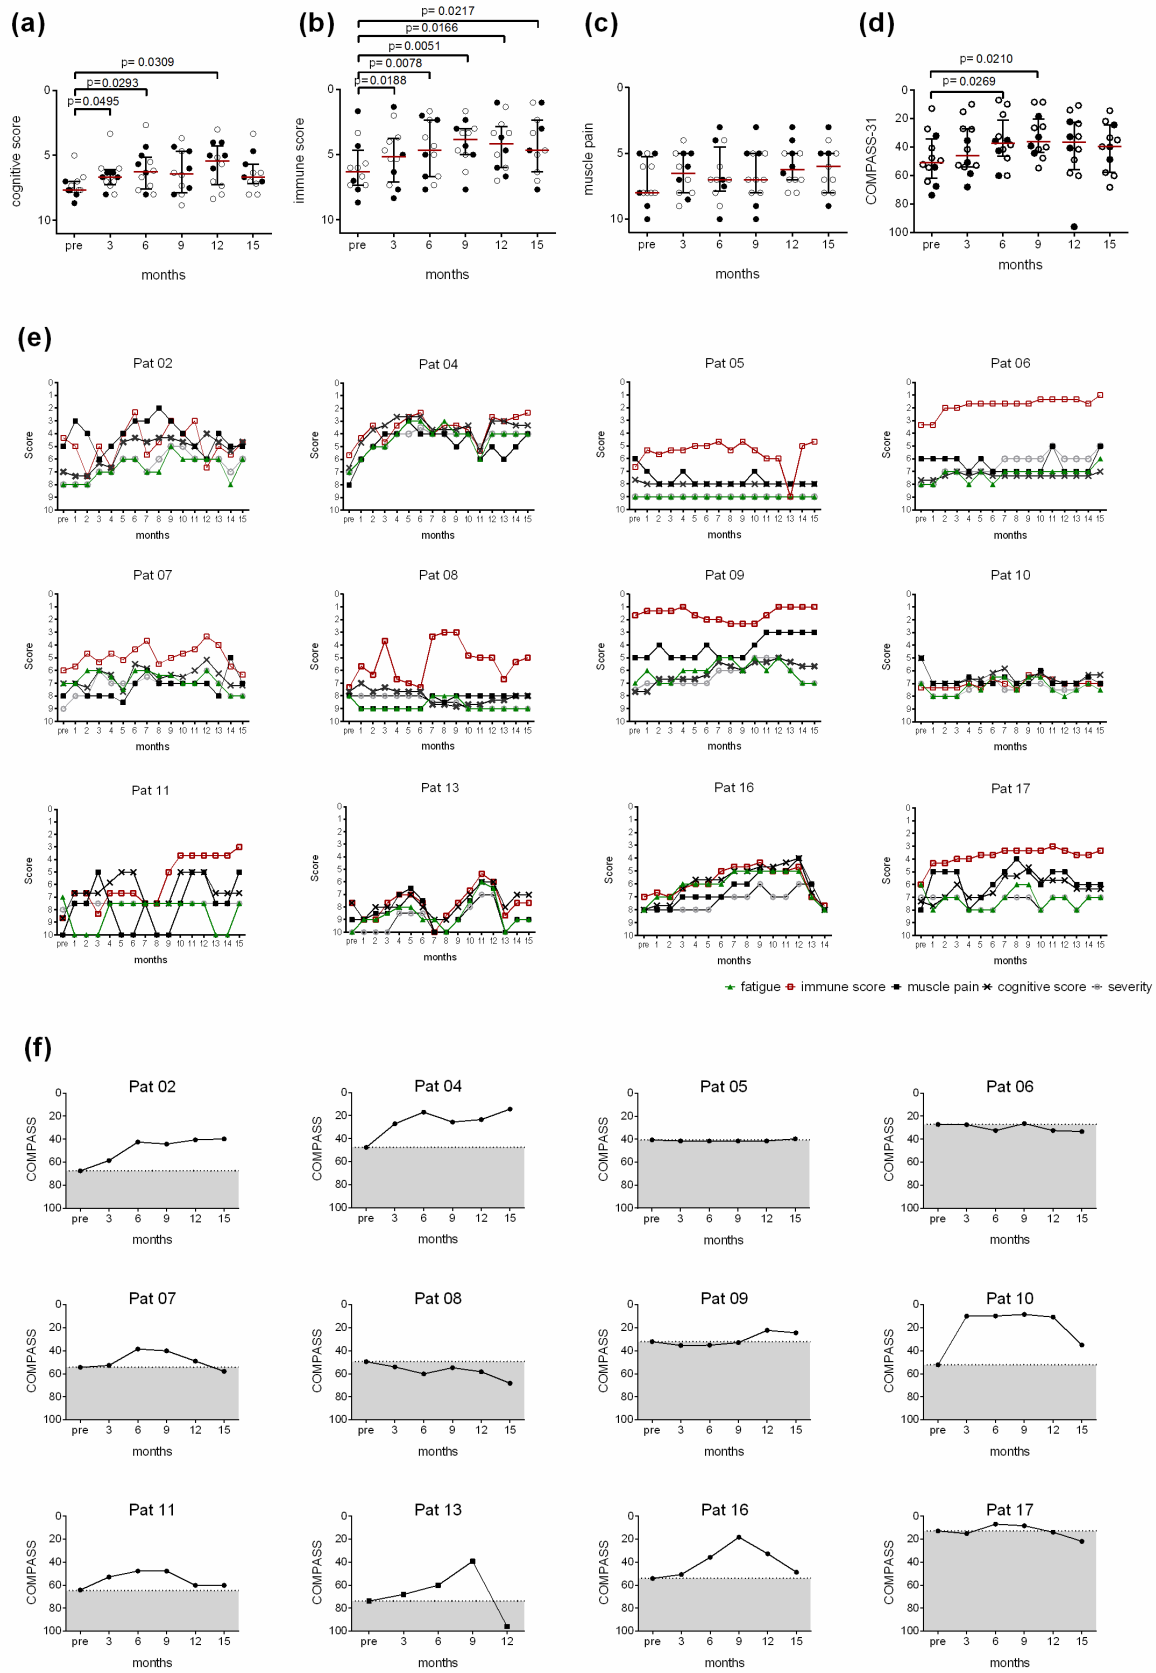

**Figure S5:** Symptoms of patients during s.c. IgG therapy. Median with interquartile range of **(a-c)** CCC symptom scores and **(d)** autonomous dysfunction (COMPASS-31) of the patients before (pre), during (months 3-12) and 3 months after treatment (month 15) are shown (responder indicated as filled circles). An overall significant improvement of symptoms during the IgG treatment at various time points was observed. Two-tailed Wilcoxon matched-pairs signed-rank test was performed for statistical analysis. **(e)** CCC symptom scores and **(f)** COMPASS-31 of the patients before (pre), during (months 3-12) and 3 months after the treatment (month 15) are shown. (COMPASS Score, healthy: 0)

S6

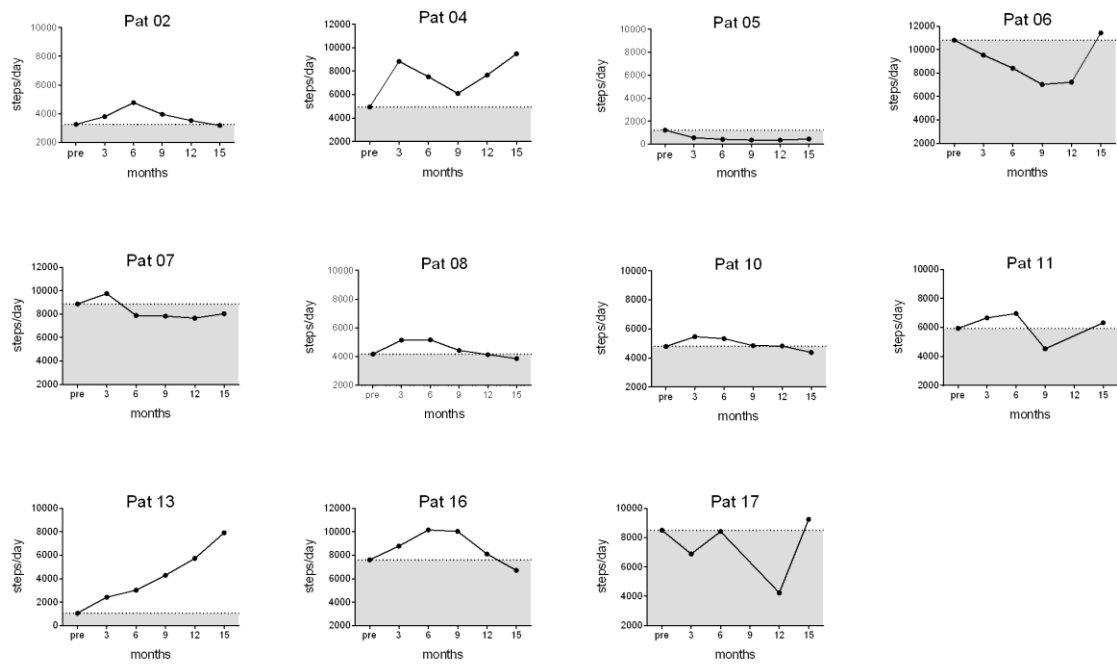

**Figure S6:** Daily steps assessed by Activity tracking. Steps of patients were counted by Vivofit® activity tracker during s.c. IgG therapy. Mean daily number of steps counted during one week before and thereafter monthly in 11 patients receiving 12 months of treatment.

**S7**

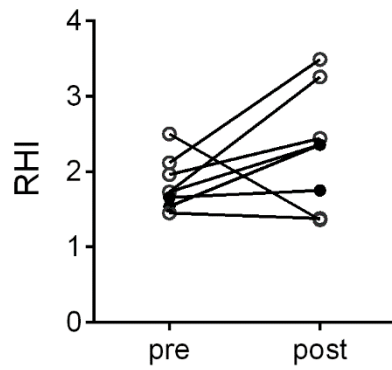

**Figure S7:** The reactive hyperemia index (RHI) assessed by Endopat. RHI of patients before (pre) and 3 months after the IgG treatment at month 15 (post) is plotted (responder indicated as filled circles).



**S8**

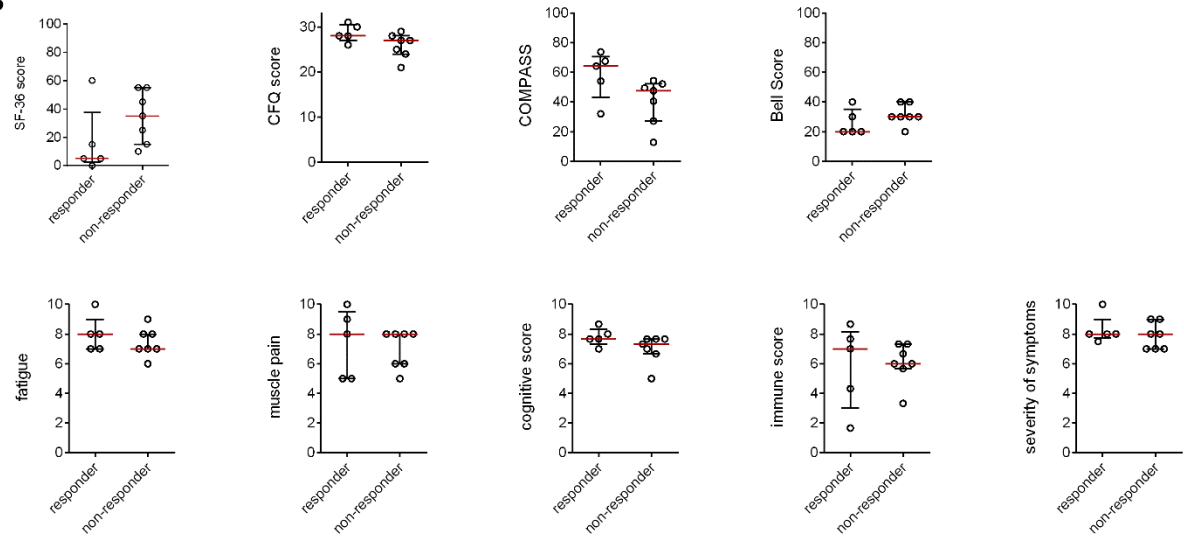

**Figure S8:** Comparative analysis of pretreatment symptoms of responder vs. non-responder. Median with interquartile ranges of SF-36, CFQ, COMPASS, Bell and CCC symptom scores of 5 responder and 7 non-responder patients, receiving 12 months of treatment, are shown.

**Table S9:** Laboratory values pretreatment (median with interquartile range [IQR])

| parameter                    | responder at month 12 (n=5) | non-responder (n=7)      | reference range |
|------------------------------|-----------------------------|--------------------------|-----------------|
| leukocytes [/nl]             | 7.96 (4.86/8.59), n=5       | 6.31 (5.86/8.66), n=7    | 3.90-10.50      |
| lymphocytes [/nl]            | 1.86 (1.635/2.565), n=5     | 2.07 (1.705/2.425), n=7  | 1.50-3.00       |
| erythrocytes [/pl]           | 4.5 (4.45/5.45), n=5        | 4.9 (4.5/5.2), n=7       | 4.3-5.8         |
| Hb [g/dl]                    | 14 (12.8/16.35), n=5        | 14.8 (13.7/15.1), n=7    | 13.5-17.0       |
| MCV [fl]                     | 86 (80.5/87), n=5           | 85 (83/87), n=7          | 80.0-99.0       |
| MCHC [g/dl]                  | 35.8 (34.15/36.15), n=5     | 35 (34/35.7), n=7        | 31.5-36.0       |
| LDH [U/l]                    | 298 (242.5/314), n=5        | 225 (212/266), n=7       | 135-250         |
| CK [U/l]                     | 121 (52.5/192.5), n=5       | 89 (63.75/113.5), n=6    | < 190           |
| CRP [mg/dl]                  | 0.7 (0.4/2.05), n=5         | 0.8 (0.3/3.6), n=7       | < 5             |
| IgG [g/l]                    | 8.96 (7.825/9.925), n=5     | 6.55 (5.68/9.97), n=7    | 7.00-16.00      |
| IgG1 [g/l]                   | 3.923 (3.768/4.907), n=4    | 3.28 (3.043/6.315), n=7  | 2.800-8.000     |
| IgG2 [g/l]                   | 4.122 (2.514/4.644), n=5    | 2.510 (1.832/3.353), n=7 | 1.120-5.700     |
| IgG3 [g/l]                   | 0.282 (0.166/0.8255), n=5   | 0.376 (0.127/0.558), n=7 | 0.240-1.250     |
| IgG4 [g/l]                   | 0.12 (0.03/0.5195), n=5     | 0.138 (0.1/0.273), n=7   | 0.052-1.250     |
| soluble IL-2 receptor [U/ml] | 328 (259/367), n=5          | 475.5 (316.8/650.3), n=6 | < 710           |
| IL-8                         | 126.6 (75.2/205.1), n=5     | 84.4 (70.75/145.1), n=6  | < 150           |
| ANA                          | negative                    | negative                 | n.a.            |
| β2 AdR AAB [Units/ml]        | 4.83 (3.705/8.79), n=5      | 5.395 (2.638/7.84), n=6  | n.a.            |
| M3 AchR AAB [Units/ml]       | 3.49 (2.795/7.955), n=5     | 3.02 (2.188/4.115), n=6  | n.a.            |

|       |                            |                            |      |
|-------|----------------------------|----------------------------|------|
| sCD26 | 866.5 (811.1/1058),<br>n=5 | 722.6 (621.3/1061),<br>n=7 | n.a. |
|-------|----------------------------|----------------------------|------|

[ANA= Antinuclear antibodies; CK= creatine kinase;  $\beta$ 2 AdR AAB= autoantibody against  $\beta$ 2 adrenergic receptor; CRP= C-reactive protein; Hb= hemoglobin; Ig=immunoglobulin; IL=interleukin; LDH= lactate dehydrogenase; MCHC= mean corpuscular haemoglobin concentration; MCV= mean corpuscular volume; M3 AchR AAB= autoantibody against Muscarinic acetylcholine receptor M3; sCD26= soluble Dipeptidyl peptidase-4; n.a. not available]
